# Supplementary material
Source: publisher site journal article supplement (https://www.dovepress.com/article/211321)
Supplement: Supplementary file 1 [file get_supplementary_file.php]

**Names of all 25 Italian centers (Hospitals and University centers specialized in the treatment of asthma) participating in the PROXIMA study:**

1. Patologia interventistica, Seconda Università Napoli-Napoli
2. Pneumologia, A.O. Maggiore della Carità-Novara
3. Pneumologia, A.O. Spedali Civili-Brescia
4. Fisiopatologia Respiratoria, Ospedale Mariano Santo-Cosenza
5. Servizio di fisiopatologia respiratoria, AOU S. Giovanni Battista Molinette-Torino
6. Clinica Pneumologica, IRCCS San Martino Genova-Genova
7. S.C. Pneumologia, Fondazione IRCCS San Matteo-Pavia
8. U.O.C. Pneumologia, Ospedale Sesto San Giovanni-Sesto San Giovanni
9. U.O.C. Pneumologia, Ospedale Santa Scolastica-Cassino
10. Pneumologia, A.O. Papa Giovanni XXIII-Bergamo
11. Allergologia, Ospedale Amico Gaetano Fucito-Mercato San Severino
12. VI Clinica Medica, Sapienza Università di Roma -Roma
13. U.O.C Broncopneumologia, Ospedale Carlo Urbani-Jesi
14. Malattie Apparato respiratorio, A.O. SS. Antonio e Biagio-Alessandria
15. U.O.C. Medicina Interna e d'urgenza, A.O.U. Policlinico Vittorio Emanuele Catania
16. Pneumologia IV, Ospedale R. Binaghi-Cagliari
17. UOD Farmacologia Clinica, Policlinico Tor Vergata-Roma
18. Allergologia, Complesso Integrato Columbus-Roma
19. U.O.C. Mal.Resp. Pneumo, A.O.U. Senese Policlinico Le Scotte-Siena
20. U.O.C. Pneumologia, Ospedale N. Melli-S.Pietro in Vernotico
21. Pneumologia Riabilitativa, Fondazione S. Maugeri-Milano
22. U.O.C. Allergologia, Policlinico Gemelli-Roma
23. U.O. Pneumologia Riabilitativa, Fondazione S. Maugeri-Tradate
24. UOC Medicina UOSD Pneumologia, Ospedale Civile-Pescara
25. S.C. Pneumologia, Ospedale Sandro Pertini-Roma
